1 **Nutrient Challenges in a Changing Atmosphere: Investigating Biomass Growth and**  
2 **Mineral Concentration Changes in Soybean Plants under Elevated CO<sub>2</sub>**

3

4 **Ravneet Kaur<sup>1,2†</sup>, Mary Durstock<sup>3,4†</sup>, Stephen A. Prior<sup>5</sup>, G. Brett Runion<sup>5</sup>, Elizabeth A.**  
5 **Ainsworth<sup>6</sup>, Ivan Baxter<sup>7</sup>, Alvaro Sanz-Sáez<sup>3</sup>, Courtney P. Leisner<sup>1,2\*</sup>**

6

7 *<sup>1</sup>School of Plant and Environmental Sciences, Virginia Polytechnic Institute and State*  
8 *University, Blacksburg, VA 24061, U.S.A.*

9 *<sup>2</sup>Department of Biological Sciences, Auburn University, Auburn, AL, 36849, USA*

10 *<sup>3</sup>Department of Crop, Soil and Environmental Sciences, Auburn University, Auburn, AL, 36849,*  
11 *USA*

12 *<sup>4</sup>Institute for Sustainability, Energy and Environment, University of Illinois Urbana-Champaign,*  
13 *Champaign, IL,*

14 *<sup>5</sup>National Soil Dynamics Laboratory, USDA Agricultural Research Service, 411 South Donahue*  
15 *Drive, Auburn, AL, 36832, USA*

16 *<sup>6</sup>Global Change and Photosynthesis Research Unit, USDA ARS, Urbana, Illinois, USA*

17 *<sup>7</sup>Donald Danforth Plant Science Center, St. Louis, Missouri, USA*

18

19 \* Corresponding author: Courtney Leisner, cleisner@vt.edu

20 † Indicates co-first author

21

22

23 **ABSTRACT**

24 Rising atmospheric CO<sub>2</sub> levels, projected to reach ~650 ppm by 2050, threaten the nutritional  
25 value of food crops. This rise is expected to increase biomass yield in C<sub>3</sub> plants through  
26 enhanced photosynthesis and water-use efficiency. However, elevated CO<sub>2</sub> (eCO<sub>2</sub>) reduces  
27 protein, nitrogen, and essential minerals like zinc (Zn) and iron (Fe) in plant leaves and seeds,  
28 posing a global nutrition risk. We conducted an experiment using Open Top Chambers to  
29 examine the response of three soybean cultivars (Clark, Flyer, and Loda) to ambient (~410 ppm)  
30 and eCO<sub>2</sub> (~610 ppm) conditions. These cultivars were selected due to their contrasting  
31 responses to eCO<sub>2</sub>. Measurements of physiological parameters (i.e., biomass, and nutrient  
32 concentration) were taken at different growth stages. Our results showed that eCO<sub>2</sub> increased  
33 carbon assimilation, leading to higher aboveground biomass and seed yield (through increased  
34 seed number) while root biomass remained unchanged. eCO<sub>2</sub> also reduced stomatal conductance  
35 and transpiration. There was a significant decrease in seed nutrient concentration at maturity,  
36 particularly iron (Fe), phosphorous (P), potassium (K), and magnesium (Mg), in plants grown in  
37 eCO<sub>2</sub>. These findings suggest that increased yield, reduced transpiration, and unchanged root  
38 biomass are key drivers of nutrient dilution in seeds under eCO<sub>2</sub>.

39

40 **KEYWORDS**

41 carbon dioxide, nutrient uptake, soybean, photosynthesis

42

43

## 44 INTRODUCTION

45 Since the industrial revolution in the late 1800s anthropogenic emissions of carbon dioxide  
46 (CO<sub>2</sub>) have increased (Friedlingstein *et al.*, 2023; IPCC, 2023). Consequently, the concentration  
47 of CO<sub>2</sub> in the Earth's atmosphere has reached unprecedented levels on a global scale  
48 (Friedlingstein *et al.*, 2023). There are several studies providing evidence of increased leaf area  
49 index, biomass and yield because of increasing atmospheric CO<sub>2</sub> concentrations (eCO<sub>2</sub>) in C<sub>3</sub>  
50 plants (Ferris *et al.*, 1999; Dermody *et al.*, 2006; Digrado *et al.*, 2024). This increase in biomass  
51 is caused by the enhanced rate of photosynthesis with simultaneous decrease in stomatal  
52 conductance which drives the increase in water-use efficiency (WUE) in C<sub>3</sub> plants, resulting in a  
53 "fertilization" effect (Drake *et al.*, 1997; Long *et al.*, 2006; Loladze, 2014; Myers *et al.*, 2014;  
54 Ainsworth & Long, 2021). Consequently, the projected rise in eCO<sub>2</sub> to ~ 650 ppm by 2050 has  
55 the potential to positively impact world food production and address the needs of a growing  
56 population (Ciais *et al.*, 2014).

57 Several studies have shown that the increased plant growth due to eCO<sub>2</sub> is accompanied  
58 by a significant reduction in protein, nitrogen and several other mineral nutrients in plant leaves  
59 and seeds (Högy & Fangmeier, 2009; Loladze, 2014; Dietterich *et al.*, 2015; Myers *et al.*, 2017;  
60 Soares *et al.*, 2019; Ainsworth & Long, 2021). Previous studies have shown that C<sub>3</sub> grains and  
61 legumes, when cultivated in future eCO<sub>2</sub> conditions projected for 2050, have reduced zinc (Zn)  
62 and iron (Fe) levels (Loladze, 2014; Myers *et al.*, 2014). The reported decrease in mineral  
63 nutrition is of consequence, as much of the world population relies on C<sub>3</sub> grains and legumes for  
64 their primary Zn and Fe intake (Tulchinsky, 2010; Myers *et al.*, 2014). This decrease in  
65 micronutrients in C<sub>3</sub> grains and legumes has the potential therefore to increase essential

66 micronutrient deficiencies in developing and developed nations, impacting around 2 billion  
67 individuals (Tulchinsky, 2010).

68         This change in micronutrients due to eCO<sub>2</sub> is associated with “hidden hunger”, which is  
69 defined as plant-based diets that meet caloric, but not nutritional needs (Kennedy, 2002; Welch  
70 & Graham, 2005). Previous work has shown that plants grown in eCO<sub>2</sub> are adding a teaspoon of  
71 total nonstructural carbohydrates (TNC) (about 5g of a starch-and-sugar mixture) per 100g of dry  
72 plant mass (Loladze, 2014). The effect on TNC:protein and TNC:mineral ratios is similar to the  
73 stoichiometric impact of adding a spoonful of carbohydrates to every 100g of dry plant tissue  
74 (Loladze, 2014). To combat this “hidden hunger” (Kennedy, 2002; Welch & Graham, 2005) a  
75 greater understanding of the physiological mechanisms responsible for reduced mineral  
76 concentration in seeds and other plant organs under higher levels of eCO<sub>2</sub> is needed.

77         There are several hypothesized mechanisms associated with the reduction in nutrient  
78 concentration in C<sub>3</sub> plants grown in eCO<sub>2</sub>. This includes 1) a reduction in transpiration in leaves  
79 and thus reduced bulk flow of nutrients (Mcgrath & Lobell, 2013); 2) an increase in the  
80 carbohydrate and fiber content, leading to a mineral dilution in seeds and other plant parts  
81 (Poorter *et al.*, 1997; Gifford *et al.*, 2000; Taub & Wang, 2008; Taub *et al.*, 2008; Chaturvedi *et*  
82 *al.*, 2017); 3) a reduction in root mineral absorption due to changes in the structure of roots  
83 (Beidler *et al.*, 2015) and an alteration in the expression of mineral transporters in root tissue  
84 (Taub & Wang, 2008; Leakey *et al.*, 2009; Jauregui *et al.*, 2016), and 4); it has been  
85 demonstrated that conditions reducing photorespiration, like high eCO<sub>2</sub>, also restrict nitrate  
86 uptake and assimilation (Searles & Bloom, 2003; Rachmilevitch *et al.*, 2004; Bloom *et al.*,  
87 2010). It is important however, to note that there is a lack of empirical data supporting all these  
88 hypotheses and that these hypothesized mechanisms are not mutually exclusive with one another.

89 Further work is needed to experimentally examine these hypotheses to determine the most likely  
90 mechanisms contributing to reduced nutrient concentration.

91 Soybean (*Glycine max* L. Merr.) is an extensively cultivated crop and is a model legume  
92 species that has notable phenotypic variation related to biomass accumulation and yield  
93 responses to eCO<sub>2</sub> (Bishop *et al.*, 2015; Sanz-Sáez *et al.*, 2017). Furthermore, soybean cultivars  
94 that exhibited an increased yield response to eCO<sub>2</sub> levels also exhibited a notable decrease in  
95 crucial mineral nutrients, specifically Fe and Zn, in their seeds (Loladze, 2014; Myers *et al.*,  
96 2014; Bishop *et al.*, 2015; Aranjuelo *et al.*, 2015). The mechanisms associated with this  
97 phenotypic variation in yield and mineral nutrient response to eCO<sub>2</sub> in soybeans are largely  
98 unknown, however (Schmutz *et al.*, 2010; Myers *et al.*, 2014; Parvin *et al.*, 2019; Soares *et al.*,  
99 2019). To begin investigating these unknowns, an experiment was conducted on the effects of  
100 elevated CO<sub>2</sub> levels on soybean physiology and plant tissue mineral concentration. Results from  
101 this work will help identify the physiological factors responsible for nutrient loss under high CO<sub>2</sub>  
102 conditions. Additionally, these findings can be used to help guide future molecular biology  
103 experiments to test the transcriptomic responses associated with these physiological changes  
104 playing an important role in developing molecular tools for creating more climate-resilient crops.  
105

## 106 **MATERIALS AND METHODS**

### 107 ***Plant Material and Experimental Conditions***

108 Soybeans were grown at the USDA-ARS National Soil Dynamics Laboratory in Auburn, AL, in  
109 open-top chambers (OTC). OTC consisted of a cylindrical, aluminum metal frame that was 3 m  
110 wide and 2.4 m tall, with the bottom half covered with clear plastic, allowing the sunlight to  
111 penetrate and reach the plants (Rogers *et al.*, 1983; Runion *et al.*, 2008). The double-walled

112 plastic chamber cover consisted of 2.5 cm of perforations in the inner plastic wall, allowing gas  
113 distribution into the chamber. Two atmospheric eCO<sub>2</sub> were used across eight chambers, four at  
114 ambient (~410 ppm) and four elevated (ambient + 200 ppm CO<sub>2</sub>) during daylight hours. Three  
115 soybean cultivars (Clark, Flyer, and Loda) were chosen based on their different yield and/or  
116 nutrient accumulation responses under eCO<sub>2</sub>: Loda had high strong yield response; Flyer showed  
117 decreased Zn accumulation in seeds; and Clark showed no change in Zn in seeds (Myers *et al.*,  
118 2014; Sanz-Sáez *et al.*, 2017; Soba *et al.*, 2020; Digrado *et al.*, 2024). Chambers were set up in  
119 a randomized complete block design ( $n = 4$ ), and each chamber contained four plants from each  
120 of the three cultivars.

121 Seeds were inoculated with commercial *Bradyrhizobium japonicum* (N-dure, Verdesian  
122 Inc., Cary, NC, <https://vlsci.com/products/n-dure/>) and germinated in a greenhouse on May 6,  
123 2021. On May 10, 2021, seedlings were transplanted into 20-liter black containers filled with soil  
124 from the E.V. Smith Research Station (Shorter, AL). The soil is classified as sandy loam,  
125 consisting of 23.6% silt and clay, 76.4% sand, 3.2% clay, and 20.4% silt with a pH of 6.1.  
126 Immediately following transplanting, containers were placed in the OTC. Following soil test  
127 recommendations from Auburn University Soil Testing Laboratory, 1 gram of potash was  
128 applied to each container and 2 grams of Miracle Gro to ensure sufficient nutrient availability.  
129 Plants were watered daily with a drip tape irrigation system that applied 1.9 liters of water every  
130 other day for the first four weeks and every day afterwards to avoid drought stress.

131

### 132 ***Leaf Gas Exchange, Crop Growth, and Harvest Measurements***

133 Leaf CO<sub>2</sub> assimilation ( $A$ ) and stomatal conductance ( $g_s$ ) were measured using an infrared gas  
134 analyzer (LI-6800, LI-COR Biosciences, Lincoln, NE). Measurements were conducted during

135 midday hours (10:00 a.m.–2:00 p.m.) on the most recently fully expanded leaf located at the top  
136 of the canopy. These measurements were taken 34 days after planting (DAP) on June 9 (V5  
137 vegetative stage) and 91 DAP (full seed, R6 developmental stage) (Fehr *et al.*, 1971) on August  
138 5. To ensure accuracy, the light intensity and temperature inside the leaf cuvette were adjusted to  
139 match the ambient conditions. The LI-6800 was used to measure the ambient light intensity. The  
140 relative humidity within the leaf cuvette was maintained at 60–70% and the concentration of CO<sub>2</sub>  
141 inside the cuvette was set to match that of the ambient or elevated OTC conditions. Gas  
142 exchange measurements were averaged from two plants per cultivar per OTC per time point.

143 Biomass sampling occurred 70 DAP (pod filling, R5 developmental stage) on July 15<sup>th</sup>  
144 and 126 DAP (maturity, R8 developmental stage) on September 9<sup>th</sup>. At the pod-filling stage (70  
145 DAP) seed count were measured immediately at harvest. Both aboveground biomass (shoots,  
146 leaves, and pods) and belowground biomass (roots) were collected at 70 DAP. The samples were  
147 oven-dried for at least 72 hours at 60 °C and then weighed. At maturity (126 DAP), aboveground  
148 biomass (stems and pods) was collected. These samples were also dried for 72 h at 60 °C and  
149 then weighed. Biomass measurements were averaged from two plants per cultivar per OTC per  
150 time point. Harvest index (HI) ( $HI = \text{seed yield} / (\text{seed yield} + \text{aboveground biomass})$ ) was also  
151 calculated for both 70 and 126 DAP harvest.

152 Nutrient analysis was also completed at 70 and 126 DAP. Aboveground (leaf, stem, and  
153 pod) and belowground (root) samples were analyzed at 70 DAP, and aboveground (stem and  
154 pods) samples were analyzed at 126 DAP. Dried tissue samples were weighted and ground. The  
155 samples were sent to Waters Agricultural Laboratory, Inc. in Camilla, GA, for nutrient  
156 concentration analysis. Macronutrient concentrations (%) of nitrogen (N), phosphorus (P),  
157 potassium (K), magnesium (Mg), sulfur (S), calcium (Ca), and micronutrient concentrations

158 (ppm) of boron (B), iron (Fe), zinc (Zn), manganese (Mn) and copper (Cu) were determined  
159 using inductively coupled plasma mass spectroscopy (ICP-MS). Samples were averaged from  
160 two plants per cultivar per OTC at both time points. Nutrient concentration of aboveground  
161 biomass samples was calculated as the sum across leaf, stem and pod tissues. Nutrient uptake for  
162 macronutrients (g/total biomass per tissue per plant) and micronutrients (mg/total biomass per  
163 tissue per plant) was calculated from nutrient concentration and biomass data. The percent  
164 change in measurements for elevated vs ambient CO<sub>2</sub> was calculated as ((elevated-  
165 ambient)/elevated) \*100.

166

### 167 *Statistical Analysis of physiological data and data visualization*

168 Statistical analysis of the physiological data (gas exchange, biomass, and nutrient analysis) was  
169 conducted using a mixed model procedure of SAS (Littell *et al.*, 1996). The cultivars and CO<sub>2</sub>  
170 treatments were considered fixed effects, while blocks were considered random effects. When  
171 the fixed effect of cultivar, CO<sub>2</sub> or their interaction was significant, Tukey's honest significant  
172 differences post-hoc test was performed to compare means (LSMEANS, SAS 9.4, SAS Institute,  
173 Cary, NC, USA). Plots were made using ggplot2 in R (v.3.4.4; Wickham *et al.* 2016), and  
174 Microsoft<sup>®</sup> Excel.

175

## 176 **RESULTS**

### 177 *Gas exchange parameters were impacted by the eCO<sub>2</sub> treatment*

178 At 34 DAP, midday stomatal conductance ( $g_s$ ) (mol H<sub>2</sub>O m<sup>-2</sup> s<sup>-1</sup>) significantly decreased in plants  
179 grown in eCO<sub>2</sub> when averaged across all cultivars (Fig. 1A). Midday stomatal conductance ( $g_s$ )  
180 decreased by 76.3% in Clark, 82.4% in Flyer, and 73.5% in Loda but main effect of cultivar was



181 not significant (Fig. 1A). At 34 DAP midday carbon assimilation ( $A$ ) ( $\mu\text{mol CO}_2 \text{ m}^{-2} \text{ s}^{-1}$ )  
182 significantly increased in plants grown in  $e\text{CO}_2$  when averaged across all cultivars but main  
183 effect of cultivar was not significant (Fig. 1B). Specifically,  $A$  increased by 18.6% in Clark, 9.4%  
184 in Flyer, and 15% in Loda (Fig. 1B). A similar trend was observed at 91 DAP as  $g_s$  was  
185 significantly decreased under  $e\text{CO}_2$  when averaged across all cultivars (Fig. 1C) with both  $e\text{CO}_2$   
186 and cultivar as significant main effects.  $g_s$  was decreased by 15.4%, 31%, and 15% in Clark,  
187 Flyer and Loda, respectively, under  $e\text{CO}_2$  (Fig. 1C). At 91 DAP,  $A$  significantly increased in  
188 plants grown in  $e\text{CO}_2$  when averaged across all cultivars (Fig. 1D).  $A$  was increased by 6.4%,  
189 18.1% and 19 % in Clark, Flyer and Loda, respectively and had significant cultivar main effect  
190 (Fig. 1D). There was also a trend for a  $\text{CO}_2$  by cultivar interaction ( $p = 0.07$ ) at 91 DAP; Flyer  
191 and Loda had a significant increase in photosynthesis under  $e\text{CO}_2$ , while Clark did not (Fig. 1D).

192

### 193 ***Biomass of aboveground but not belowground plant tissues increased under $e\text{CO}_2$ conditions***

194 At 70 DAP aboveground biomass was significantly increased under  $e\text{CO}_2$  levels when averaged  
195 across all cultivars, but there was no significant interaction between cultivar and  $\text{CO}_2$  (Fig. 2A,  
196 Table S1a). Aboveground biomass increased by 19.43%, 20.28% and 22.46% in Clark, Flyer and  
197 Loda, respectively. When averaged across all cultivars leaf biomass was also significantly  
198 increased under  $e\text{CO}_2$  (Fig. 3A). There was also a significant cultivar main effect for leaf  
199 biomass with Loda having lower biomass than Clark and Flyer (Fig. 3A). At 70 DAP, root  
200 biomass was affected only by cultivar; Loda had significantly lower root biomass than both  
201 Clark and Flyer (Fig. 3B Table S1a).

202 At 70 DAP seed yield increased under  $e\text{CO}_2$  when averaged across cultivars (Fig. 2C,  
203 Table S1a). There was also a significant cultivar effect on seed yield; Loda had significantly

204 higher seed yield than Clark and Flyer, regardless of treatment (Fig. 2C). Per seed dry weight  
205 was not affected by elevated CO<sub>2</sub> and varied significantly only with cultivar at 70 DAP (Fig.  
206 S1A). Per seed dry weight was significantly higher for Loda than other cultivars (Fig. S1A). At  
207 70 DAP total seed number was higher under eCO<sub>2</sub> and was also significantly affected by cultivar  
208 (Fig. S2A). Total seed number was significantly higher in Flyer than Clark, regardless of CO<sub>2</sub>  
209 treatment (Fig. S2A). There was no effect of CO<sub>2</sub> on HI at 70 DAP; however, a significant  
210 cultivar main effect was present (Fig. S3A). Loda had significantly higher HI than other cultivars  
211 regardless of CO<sub>2</sub> treatments.

212 At 126 DAP, aboveground biomass (pod and stem) was significantly increased under  
213 eCO<sub>2</sub> when averaged across cultivars (Fig. 2B, Table S1b). Flyer (21.5%) and Clark (22.39%)  
214 showed a significant increase and Loda (19.72%) showed a marginally significant increase in  
215 aboveground biomass under eCO<sub>2</sub> compared to ambient CO<sub>2</sub> (Fig. 2B, Table S1b). Seed yield  
216 had a 14.46% increase in plants grown in eCO<sub>2</sub> when averaged across cultivars (Fig. 2D, Table  
217 S1b). Per seed dry weight only varied significantly with cultivar (Fig. S1B). Clark and Loda had  
218 significantly higher per seed dry weight than Flyer regardless of CO<sub>2</sub> level (Fig. S1B). Total seed  
219 number significantly increased in plants grown in eCO<sub>2</sub> when averaged across all cultivars (Fig.  
220 S2B). There was also a significant main effect of cultivar on total seed number at 126 DAP, with  
221 Flyer having higher seed numbers than the other cultivars (Fig. S2B). There was significant  
222 reduction in HI under eCO<sub>2</sub> with CO<sub>2</sub> and cultivar as significant main effect (Fig. S3B).

223

224 *Nutrient concentration in different plant tissues changed under eCO<sub>2</sub> conditions*

225 *Macronutrients*

226 The concentration of macronutrients (N, P, K, Mg, Ca, and S) was assessed at the 70 DAP and  
227 126 DAP. At 70 DAP nutrient concentration was measured in root, seed, and aboveground  
228 biomass (combination of leaf, pod and stem). At 126 DAP, macronutrient concentration was  
229 measured in stems and seeds only. At 70 DAP the concentration of macronutrients in seeds  
230 varied significantly only with cultivar, except for S which had both cultivar and CO<sub>2</sub> as  
231 significant main effects (Fig. 4A; Table S2). Additionally, N concentration had a significant CO<sub>2</sub>  
232 x cultivar interaction (Fig. 4A). N had a decrease of 1.1% in Clark and 2.4% in Flyer, and an  
233 increase of 1.5% in Loda in eCO<sub>2</sub>. Leaf macronutrient concentration did not change with eCO<sub>2</sub>  
234 or cultivar (Table S2). In roots no macronutrient concentration showed a significant change with  
235 eCO<sub>2</sub> except for a significant increase in Mg (5.7-13.4%), a significant decrease in S (5-21%)  
236 and a marginally significant decrease in K ( $p = 0.07$ ; 7.2-38%) when averaged across cultivars  
237 (Table S2). In aboveground tissues N, Mg and Ca varied significantly with cultivar. K was  
238 significantly reduced with eCO<sub>2</sub> while P and S varied significantly by both eCO<sub>2</sub> and cultivar  
239 (Table S2). Nutrient uptake of macronutrients increased in leaves (6.3%- 38.43%) under eCO<sub>2</sub> at  
240 70 DAP when averaged across all cultivars and was also significantly impacted by cultivar  
241 regardless of CO<sub>2</sub> treatment (Fig. S4A; Table S4). The leaves of cultivar Loda showed  
242 significantly higher uptake of Mg, Ca, and S, whereas Flyer had a significant increase in Ca and  
243 S uptake under eCO<sub>2</sub> (Fig. S4A; Table S4). At 70 DAP nutrient uptake of only N and Mg were  
244 significantly increased by eCO<sub>2</sub> when averaged across cultivars in roots (Fig. S4B; Table S4),  
245 while Ca ( $p = 0.052$ ) showed a marginally significant increase in nutrient uptake in eCO<sub>2</sub>  
246 averaged across all cultivars (Fig. S4B; Table S4). Uptake of all macronutrients in roots varied  
247 significantly with cultivar at 70DAP except for Cu ( $p = 0.081$ ) (Fig. S4B; Table S4).

248 At 126 DAP all seed macronutrients showed a significant main effect of cultivar (Fig.  
249 4B; Table S3). There was significant decrease caused by eCO<sub>2</sub> for P, K, and Mg when averaged  
250 across all cultivars (Fig 4B). Reduction in P, K, and Mg concentrations in seed under eCO<sub>2</sub>  
251 varied from 0.7% - 10.6% across cultivars. There was a moderately significant reduction in Ca ( $p$   
252 = 0.051) in plants grown in eCO<sub>2</sub> when averaged across cultivars (Fig. 4B). There was also a  
253 moderately significant CO<sub>2</sub> x cultivar interaction for Mg ( $p$  = 0.056) (Fig. 4B; Table S3). Mg  
254 decreased in Flyer significantly with eCO<sub>2</sub> (Fig. 4B). In aboveground tissue macronutrients such  
255 as P, Ca and S varied significantly by cultivar (Table S3). None of the macronutrients in  
256 aboveground biomass showed significant change with eCO<sub>2</sub> (Table S3). At 126 DAP seeds  
257 showed an increase (4.1% - 154.2%) for uptake of all macronutrients under eCO<sub>2</sub>, with Cu  
258 having a moderately significant increase ( $p$  = 0.056). Mg and Ca also varied significantly with  
259 cultivar as significant main effect (Fig. 6; Table S4).

260

### 261 *Micronutrients*

262 The concentration of micronutrients (B, Zn, Mn, Fe, and Cu) was also measured 70 and 126  
263 DAP. At 70 DAP nutrient concentration was measured in root, seed, and aboveground biomass  
264 and at 126 DAP nutrient concentration was measured in stems and seeds only. All seed  
265 micronutrients at 70 DAP showed a significant main effect of cultivar, and Zn, B, and Cu were  
266 significantly decreased by eCO<sub>2</sub> when averaged across cultivars (Fig. 5A; Table S2). Mn had a  
267 slight increase in eCO<sub>2</sub> when averaged across cultivars ( $p$  = 0.077). There was also a significant  
268 CO<sub>2</sub> x cultivar interaction for Zn and Cu in seeds at 70 DAP (Fig. 5A). The concentration of Zn  
269 in Clark was reduced by 15.7% in eCO<sub>2</sub>, and Cu in Loda was reduced by 14.8% under eCO<sub>2</sub>. The  
270 concentration of B was significantly reduced in Clark under eCO<sub>2</sub> by 23.1% (Fig. 5A; Table S2).

271 At 70 DAP B, Zn and Cu were the only micronutrients which varied in aboveground tissue with  
272 eCO<sub>2</sub> as significant main effect (Table S2). None of the micronutrients in leaf tissue changed  
273 significantly with eCO<sub>2</sub> or cultivar (Table S2). Concentration of Zn, Fe and Mn in roots varied  
274 with cultivar as significant main effect whereas concentration of B and Cu did not show  
275 significant change with eCO<sub>2</sub> or cultivar (Table S2).

276 Nutrient uptake for micronutrients was also measured at 70 DAP. Nutrient uptake of  
277 micronutrients was significantly increased by eCO<sub>2</sub> in leaves at 70 DAP, with the except of Zn  
278 and Fe (Fig. S4A; Table 4). Only B and Cu had a significant cultivar main effect, with Mn  
279 having a moderate cultivar main effect ( $p = 0.065$ ) (Fig. S4A; Table S4). B showed a significant  
280 increase in Loda and Cu showed a significant increase in Flyer under eCO<sub>2</sub> (Fig. S4A; Table S4).  
281 The micronutrient uptake in root tissue at 70 DAP varied with cultivar as significant main effect  
282 except Fe ( $p = 0.055$ ) and Cu ( $p = 0.081$ ) which had marginally significant effect of cultivar (Fig.  
283 S4B; Table S4). There was no significant impact of eCO<sub>2</sub> on nutrient uptake of micronutrients in  
284 roots at 70 DAP (Fig. S4B; Table S4).

285 At 126 DAP, seed concentrations of Fe, B, and Cu significantly decreased under eCO<sub>2</sub>  
286 when averaged across cultivars (Fig. 5B; Table S3). Additionally, there was a significant effect  
287 of cultivar on Zn, Fe, B, and Cu levels. Both Fe and Cu concentrations were reduced across all  
288 cultivars, with Fe decreasing by 11.7 in Clark, 2.5% in Flyer, and 2.4% in Loda, and Cu  
289 decreasing by 7.7% in Clark, 6.3% in Flyer, and 14.4% in Loda. Zn concentrations were reduced  
290 only in Clark (11.04%) and Loda (6.35%) under eCO<sub>2</sub>. B also showed a marginally significant  
291 CO<sub>2</sub> x cultivar interaction ( $p = 0.057$ ), with B concentrations significantly reduced in Clark  
292 (42%), Flyer (27%), and Loda (32%) under eCO<sub>2</sub>. Although there was no significant effect of  
293 CO<sub>2</sub> or cultivar on Mn concentration, there was a general decrease in Mn concentration with

294 eCO<sub>2</sub> when averaged across cultivars ( $p = 0.078$ ). B was the only micronutrient that decreased in  
295 aboveground tissue with both eCO<sub>2</sub> and cultivar as significant main effects (Fig. 6; Table S3.  
296 Uptake of all micronutrients except B increased in seeds at 126 DAP under eCO<sub>2</sub> (Fig. 6).  
297 Reduction in B uptake was significantly impacted by both CO<sub>2</sub> and cultivar and B was decreased  
298 in eCO<sub>2</sub>. Finally, Zn uptake was significantly impacted by cultivar only (Fig. 6; Table S3).

299

## 300 **DISCUSSION**

301 The aim of this study was to explore the physiological mechanisms underlying plant nutrient  
302 responses to eCO<sub>2</sub> levels. We selected soybean, a key C<sub>3</sub> commodity crop and a model for  
303 legume species, due to its significant role in ecosystem services through atmospheric nitrogen  
304 fixation via symbiotic relationships with microorganisms (Schmutz *et al.*, 2010). Our research  
305 focused on three soybean cultivars—Clark, Flyer, and Loda—chosen for their contrasting  
306 phenotypes under eCO<sub>2</sub> conditions (Myers *et al.*, 2014; Sanz-Sáez *et al.*, 2017). Flyer and Loda  
307 were known to show reduction in Zn concentration (Myers *et al.*, 2014). Loda was previously  
308 documented to show increased yield and Clark was documented to be non-responsive under  
309 eCO<sub>2</sub> (Bishop *et al.*, 2015). This approach allowed us to investigate how different cultivars  
310 respond to increased CO<sub>2</sub> and the resulting impacts on nutrient uptake and assimilation.

311

312 *Increased carbon assimilation and WUE under eCO<sub>2</sub> resulted in increased yield due to increase*  
313 *in seed number*

314 The eCO<sub>2</sub> treatments significantly enhanced  $A$  and reduced  $g_s$  in soybean plants, leading to  
315 improved WUE (Fig. 1). At both 34 and 91 DAP,  $A$  increased notably across all cultivars, with  
316 Flyer and Loda showing the most significant enhancements under eCO<sub>2</sub> conditions (Fig. 1B-1D).

317 This increase in  $A$  was accompanied by a substantial reduction in  $g_s$ , indicating improved WUE  
318 (Fig. 1A-1C). The increased photosynthetic efficiency under  $eCO_2$  conditions contributed to  
319 greater biomass accumulation in aboveground plant tissues (Fig. 2A) at 70, as well as at 126  
320 DAP (Fig. 2B).

321 Furthermore,  $eCO_2$  led to a significant increase in total seed yield, primarily driven by an  
322 increase in seed number rather than individual seed weight (Fig. 2C-D; Fig. S1-S2). This  
323 suggests that the enhanced yield observed under  $eCO_2$  can be attributed to the increased number  
324 of seeds produced per plant, highlighting the role of improved carbon assimilation and WUE in  
325 driving yield increases in soybean. The findings underscore the potential of  $eCO_2$  to enhance  
326 crop productivity through physiological adaptations that boost photosynthesis and optimize water  
327 usage, resulting in more seeds and total yield per plant (Fig. 1; Fig. 2B). Our results align with  
328 previously reported studies showing increased  $A$  and WUE resulting in stimulated increased  
329 biomass and yield in soybean (Ferris *et al.*, 1999). Previous work also found increased seed yield  
330 under  $eCO_2$  was attributable to increased pod number and total seed number per plant, causing an  
331 increase in total seed yield per plant (Rogers *et al.*, 1984; Li *et al.*, 2013).

332

333 *Reduced seed nutrient concentration was observed when plants were grown in  $eCO_2$*

334 The concentrations of macronutrients like P, K, and Mg, as well as micronutrients such as Fe, B,  
335 and Cu were significantly decreased in seeds at maturity (126 DAP) in soybean plants grown in  
336  $eCO_2$  (Fig. 4-5 and Table S2-S3). There was also a moderately significant reduction in Ca and  
337 Mn concentrations in seeds under  $eCO_2$  at maturity (Fig. 4-5). Mg is essential for the functioning  
338 of ribulose 1,5-bisphosphate carboxylase/oxygenase (Rubisco) and chlorophyll (McGrath &  
339 Lobell 2013), and the increased carbon assimilation associated with  $eCO_2$  levels during the 70

340 DAP could potentially explain the reduced Mg concentration in seeds. Previous studies have also  
341 observed a similar reduction in Cu concentration under eCO<sub>2</sub>, while Mg has been previously  
342 shown to increase in eCO<sub>2</sub> in fresh edible soybean varieties (Li *et al.*, 2018). Taken together,  
343 findings from this study suggest that the observed increase in seed yield, driven by the higher  
344 number of seeds, might contribute to the observed mineral dilution across the total seeds  
345 produced by each plant. Similar results have been seen previously where increased yield either  
346 due to eCO<sub>2</sub> or breeding has resulted in reduced P, K, Mg, Fe, B, Zn, and Cu concentration  
347 (Monasterio & Graham 2000; Mcgrath & Lobell 2013; Myers *et al.*, 2014).

348

#### 349 *Cultivar-specific responses to eCO<sub>2</sub> were observed*

350 eCO<sub>2</sub> significantly increased seed yield in Loda, primarily due to an increased number of seeds  
351 rather than individual seed weight (Fig. S3-S4). This increase in yield was associated with a  
352 substantial rise in *A* and a notable reduction in *g<sub>s</sub>*, leading to improved WUE (Fig. 1A and 1C).  
353 Despite the higher yield, Loda exhibited a consistent reduction in both macro- and micronutrient  
354 concentrations at 70 and 126 DAP. Previous studies have demonstrated a strong yield increase  
355 for Loda under eCO<sub>2</sub> (Bishop *et al.*, 2015; Sanz-Sáez *et al.*, 2017; Digrado *et al.*, 2024). This  
356 trend was evident across multiple growth stages, highlighting the challenge of nutrient dilution in  
357 high-yielding cultivars under future atmospheric conditions.

358 Clark showed a negative percent change in nutrient concentration in seeds at 126 DAP  
359 for macronutrients like P, K, Mg, S, and Ca, and micronutrients such as Zn, Fe, B, Mn, and Cu.  
360 It also showed increased seed yield with eCO<sub>2</sub> (Fig. 2D; Fig. 4-5; Table S2, S3). Flyer exhibited  
361 an increase in aboveground biomass at both 70 and 126 DAP (Fig. 2A and 2B), along with a  
362 notable reduction in key nutrients such as P, K, and Mg in seeds at 126 DAP (Fig. 4-5).



363 However, we observed almost no change in Zn concentration at 70 DAP and a slight positive  
364 percent change in Zn concentration in Flyer at 126 DAP (Fig. 4-5).

365 Previously, Clark has been shown to be non-responsive to eCO<sub>2</sub> in terms of yield and  
366 seed nutrient concentration, and Flyer has been known to show a significant reduction in Zn  
367 concentration (Myers *et al.*, 2014; Bishop *et al.*, 2015). A study by Bishop *et al.*, (2015)  
368 examining the impact of eCO<sub>2</sub> on nine cultivars of soybean (including Clark) reported a  
369 significant impact of genotype by year interaction on seed yield, however. Previous studies have  
370 also shown the complexity of yield and nutrient concentration responses in soybean cultivars  
371 grown under different environmental stresses, geographical locations, and during different years  
372 (Köhler *et al.*, 2019; Digrado *et al.*, 2024). For example, a recent study found that when soybean  
373 plants were grown in eCO<sub>2</sub> and elevated temperature there no observed yield gains or nutrient  
374 losses (Köhler *et al.*, 2019). This indicates that the observed cultivar-specific responses observed  
375 in our study may differ from previous studies due to genotype x environmental interactions. This  
376 is an important consideration for future work investigating cultivar-specific impacts of eCO<sub>2</sub> on  
377 nutrient concentration in soybean.

378

379 *Lack of response of root biomass with eCO<sub>2</sub> may be contributing to decreases in nutrient*  
380 *concentration in seeds*

381 Our study reports an increase in seed yield and aboveground biomass at both 70 DAP and 126  
382 DAP (Fig. 4 and Table S1). Leaf biomass at 70 DAP increased with eCO<sub>2</sub> in all genotypes (Fig.  
383 3A). Leaf biomass and nutrient uptake of all nutrients except Zn and Fe at 70 DAP increased  
384 with eCO<sub>2</sub> in all genotypes (Fig. 3A; Fig. S4A). Although the effect of the cultivar on nutrient  
385 uptake by leaves was significant for most nutrients, and marginally significant for Mn ( $p =$

386 0.065) it was not significant for Zn and Fe. Under eCO<sub>2</sub>, the uptake of all nutrients, except for Zn  
387 and Fe, increased significantly when averaged across all cultivars (Fig. S4A; Table S4).  
388 However, root biomass measured at 70 DAP (Fig. 3B) did not show any change under eCO<sub>2</sub>.  
389 Additionally, we observed increases in the uptake of all macro- and micronutrients in seeds  
390 (except for a decrease in B) and leaves (except Zn and Fe) under eCO<sub>2</sub> (Fig. 6; Fig. S4A), In  
391 roots however, but, there was no significant response in nutrient uptake, except for increase N,  
392 Mg, and Ca ( $p = 0.052$ ) to eCO<sub>2</sub> (Fig. S4B).

393         Root architecture, morphology, and physiology play a primary role in water and nutrient  
394 acquisition from the soil (Wang *et al.*, 2006) and could therefore play an important role in  
395 nutrient concentration in seeds. Previous work has found that eCO<sub>2</sub> increased root biomass in  
396 non-nodulating soybeans (Rogers *et al.*, 1992), while Van Vuuren *et al.*, (1997) found eCO<sub>2</sub>  
397 delayed root development in spring wheat. We hypothesize that if eCO<sub>2</sub> results in delayed root  
398 development during growth stages associated with pod filling and nutrient accumulation in seeds  
399 (Bender *et al.*, 2015), it could lead to reduced nutrient absorption and transport by roots. It is of  
400 note that while our study was done in pots, we used 20-liter pots which have been shown to be of  
401 sufficient size to not impact root biomass in soybean (Ainsworth *et al.*, 2002; Poorter *et al.*,  
402 2012). Future work focusing on soybean root biomass changes under eCO<sub>2</sub> in field conditions is  
403 needed to better understand how root biomass changes under eCO<sub>2</sub> and the impact this may have  
404 on nutrient accumulation in seeds.

405

## 406 **CONCLUSION**

407 Overall, findings of this study enhance our understanding of how eCO<sub>2</sub> impacts the nutrient  
408 concentration in soybean seeds. By measuring physiological parameters such as carbon

409 assimilation ( $A$ ) and stomatal conductance ( $g_s$ ), and the biomass of individual tissues like leaf,  
410 seed, stem, and root we highlighted the role of  $g_s$  and nutrient uptake and transport, particularly  
411 in roots. Our work supports the claim that  $eCO_2$  leads to a reduction in micronutrient  
412 concentrations in seeds and there is significant cultivar variation in this response. Furthermore,  
413 we observed likely genotype x-environment interactions in cultivar-specific responses to  $eCO_2$ ,  
414 namely in the change in Zn and other nutrients in Clark which was previously hypothesized to be  
415 non-responsive to  $eCO_2$ . We propose that an increased number of seeds, rather than increased per  
416 seed weight, contributes to the reduction in seed nutrient concentration due to mineral dilution.  
417 Additionally,  $eCO_2$  resulted in increased  $A$  and increased biomass of leaves, stems, and seeds but  
418 did not impact root biomass. The root nutrient uptake of only N, Mg and Ca increased  
419 significantly under  $eCO_2$ . This suggests that roots could not compensate for the increase in  $A$  by  
420 enhancing nutrient absorption, uptake and transport, leading to reduced nutrient concentration in  
421 seeds. Future research should aim to enhance our understanding of how nutrient transport and  
422 absorption by roots are affected under elevated  $CO_2$  conditions.

423

#### 424 **ACKNOWLEDGEMENTS**

425 We would like to thank Collin Modelski for assisting in various activities of data collection. This  
426 work is supported by a USDA NIFA award (#2022-67013-36126) to CPL.

427

#### 428 **CONFLICT OF INTEREST STATEMENT**

429 The authors declare no conflicts of interest.

430

#### 431 **DATA AVAILABILITY STATEMENT**

432 Data from this research will be made available upon request.

433

434

435 **References**

- 436 Ainsworth, E.A. *et al.* (2002) ‘A meta-analysis of elevated [CO<sub>2</sub>] effects on soybean (*Glycine*  
437 *max*) physiology, growth and yield’, *Global Change Biology*, 8(8), pp. 695–709. Available at:  
438 <https://doi.org/10.1046/j.1365-2486.2002.00498.x>.
- 439 Ainsworth, E.A. and Long, S.P. (2021) ‘30 years of free-air carbon dioxide enrichment  
440 (FACE): What have we learned about future crop productivity and its potential for adaptation?’,  
441 *Global Change Biology*, 27(1), pp. 27–49. Available at: <https://doi.org/10.1111/gcb.15375>.
- 442 Aranjuelo, I. *et al.* (2015) ‘Differential CO<sub>2</sub> effect on primary carbon metabolism of flag leaves  
443 in durum wheat (*Triticum durum* Desf.): Leaf metabolism as affected by phenology and [CO<sub>2</sub>]’,  
444 *Plant, Cell & Environment*, 38(12), pp. 2780–2794. Available at:  
445 <https://doi.org/10.1111/pce.12587>.
- 446 Beidler, K.V. *et al.* (2015) ‘Changes in root architecture under elevated concentrations of CO<sub>2</sub>  
447 and nitrogen reflect alternate soil exploration strategies’, *New Phytologist*, 205(3), pp. 1153–  
448 1163. Available at: <https://doi.org/10.1111/nph.13123>.
- 449 Bender, R.R., Haegerle, J.W. and Below, F.E. (2015) ‘Nutrient Uptake, Partitioning, and  
450 Remobilization in Modern Soybean Varieties’, *Agronomy Journal*, 107(2), pp. 563–573.  
451 Available at: <https://doi.org/10.2134/agronj14.0435>.
- 452 Bishop, K.A. *et al.* (2015) ‘Is there potential to adapt soybean (*Glycine max* Merr.) to future  
453 [CO<sub>2</sub>]? An analysis of the yield response of 18 genotypes in free-air CO<sub>2</sub> enrichment’, *Plant,*  
454 *Cell & Environment*, 38(9), pp. 1765–1774. Available at: <https://doi.org/10.1111/pce.12443>.
- 455 Bloom, A.J. *et al.* (2010) ‘Carbon Dioxide Enrichment Inhibits Nitrate Assimilation in Wheat  
456 and *Arabidopsis*’, *Science*, 328(5980), pp. 899–903. Available at:  
457 <https://doi.org/10.1126/science.1186440>.
- 458 Chaturvedi, A.K. *et al.* (2017) ‘Elevated CO<sub>2</sub> and heat stress interactions affect grain yield,  
459 quality and mineral nutrient composition in rice under field conditions’, *Field Crops Research*,  
460 206, pp. 149–157.
- 461 Ciais, P. *et al.* (2014) ‘Carbon and other biogeochemical cycles’, in *Climate change 2013: the*  
462 *physical science basis. Contribution of Working Group I to the Fifth Assessment Report of the*  
463 *Intergovernmental Panel on Climate Change*. Cambridge University Press, pp. 465–570.
- 464 Dermody, O., Long, S.P. and DeLucia, E.H. (2006) ‘How does elevated CO<sub>2</sub> or ozone affect the  
465 leaf-area index of soybean when applied independently?’, *New Phytologist*, 169(1), pp. 145–155.  
466 Available at: <https://doi.org/10.1111/j.1469-8137.2005.01565.x>.
- 467 Dietterich, L.H. *et al.* (2015) ‘Impacts of elevated atmospheric CO<sub>2</sub> on nutrient content of  
468 important food crops’, *Scientific Data*, 2(1), p. 150036. Available at:  
469 <https://doi.org/10.1038/sdata.2015.36>.

- 470 Digrado, A. *et al.* (2024) ‘Seed quality under elevated CO<sub>2</sub> differs in soybean cultivars with  
471 contrasting yield responses’, *Global Change Biology*, 30(2), p. e17170. Available at:  
472 <https://doi.org/10.1111/gcb.17170>.
- 473 Drake, B.G., González-Meler, M.A. and Long, S.P. (1997) ‘MORE EFFICIENT PLANTS: A  
474 Consequence of Rising Atmospheric CO<sub>2</sub>?’’, *Annual Review of Plant Physiology and Plant  
475 Molecular Biology*, 48(1), pp. 609–639. Available at:  
476 <https://doi.org/10.1146/annurev.arplant.48.1.609>.
- 477 Ehdaie, B. *et al.* (2010) ‘Root System Size Influences Water-Nutrient Uptake and Nitrate  
478 Leaching Potential in Wheat’, *Journal of Agronomy and Crop Science*, 196(6), pp. 455–466.  
479 Available at: <https://doi.org/10.1111/j.1439-037X.2010.00433.x>.
- 480 Fehr, W.R. *et al.* (1971) ‘Stage of Development Descriptions for Soybeans, *Glycine Max* (L.)  
481 Merrill’, *Crop Science*, 11(6), p. cropsci1971.0011183X001100060051x. Available at:  
482 <https://doi.org/10.2135/cropsi1971.0011183X001100060051x>.
- 483 Ferris, R. *et al.* (1999) ‘Seed Yield after Environmental Stress in Soybean Grown under Elevated  
484 CO<sub>2</sub>’, *Crop Science*, 39(3), p. cropsci1999.0011183X003900030018x. Available at:  
485 <https://doi.org/10.2135/cropsi1999.0011183X003900030018x>.
- 486 Friedlingstein, P. *et al.* (2023) ‘Global Carbon Budget 2023’, *Earth System Science Data*,  
487 15(12), pp. 5301–5369. Available at: <https://doi.org/10.5194/essd-15-5301-2023>.
- 488 Gifford, R.M., Barrett, D.J. and Lutze, J.L. (2000) ‘The effects of elevated [CO<sub>2</sub>] on the C: N  
489 and C: P mass ratios of plant tissues’, *Plant and Soil*, 224, pp. 1–14.
- 490 Högy, P. and Fangmeier, A. (2009) ‘Atmospheric CO<sub>2</sub> enrichment affects potatoes: 2. Tuber  
491 quality traits’, *European Journal of Agronomy*, 30(2), pp. 85–94. Available at:  
492 <https://doi.org/10.1016/j.eja.2008.07.006>.
- 493 Intergovernmental Panel on Climate Change (IPCC) (ed.) (2023) ‘Summary for Policymakers’,  
494 in *Climate Change 2022 – Impacts, Adaptation and Vulnerability: Working Group II  
495 Contribution to the Sixth Assessment Report of the Intergovernmental Panel on Climate Change*.  
496 Cambridge: Cambridge University Press, pp. 3–34. Available at:  
497 <https://doi.org/10.1017/9781009325844.001>.
- 498 Jauregui, I. *et al.* (2016) ‘Root-shoot interactions explain the reduction of leaf mineral content in  
499 *Arabidopsis* plants grown under elevated [CO<sub>2</sub>] conditions’, *Physiologia Plantarum*, 158(1), pp.  
500 65–79. Available at: <https://doi.org/10.1111/ppl.12417>.
- 501 Kennedy, G. (2002) ‘The scourge of "hidden hunger"; global dimensions of micronutrient  
502 deficiencies’, *Food, Nutri. Agric.*, 32.
- 503 Köhler, I.H. *et al.* (2019) ‘Increased temperatures may safeguard the nutritional quality of crops  
504 under future elevated CO<sub>2</sub> concentrations’, *The Plant Journal*, 97(5), pp. 872–886. Available at:  
505 <https://doi.org/10.1111/tpj.14166>.

- 506 Leakey, A.D. *et al.* (2009) 'Elevated CO<sub>2</sub> effects on plant carbon, nitrogen, and water relations:  
507 six important lessons from FACE', *Journal of experimental botany*, 60(10), pp. 2859–2876.
- 508 Li, D. *et al.* (2013) 'Effects of elevated CO<sub>2</sub> on the growth, seed yield, and water use efficiency  
509 of soybean (*Glycine max* (L.) Merr.) under drought stress', *Agricultural Water Management*,  
510 129, pp. 105–112.
- 511 Li, Y. *et al.* (2018) 'Impact of Elevated CO<sub>2</sub> on Seed Quality of Soybean at the Fresh Edible and  
512 Mature Stages', *Frontiers in Plant Science*, 9, p. 1413. Available at:  
513 <https://doi.org/10.3389/fpls.2018.01413>.
- 514 Littell, R.C. *et al.* (1996) 'SAS system for mixed models. SAS Inst', *Inc., Cary, NC*, 633.
- 515 Loladze, I. (2014) 'Hidden shift of the ionome of plants exposed to elevated CO<sub>2</sub> depletes  
516 minerals at the base of human nutrition', *eLife*, 3, p. e02245. Available at:  
517 <https://doi.org/10.7554/eLife.02245>.
- 518 Long, S.P. *et al.* (2006) 'Food for Thought: Lower-Than-Expected Crop Yield Stimulation with  
519 Rising CO<sub>2</sub> Concentrations', *Science*, 312(5782), pp. 1918–1921. Available at:  
520 <https://doi.org/10.1126/science.1114722>.
- 521 Mcgrath, J.M. and Lobell, D.B. (2013) 'Reduction of transpiration and altered nutrient allocation  
522 contribute to nutrient decline of crops grown in elevated CO<sub>2</sub> concentrations: Nutrient decline  
523 mechanisms in CO<sub>2</sub>', *Plant, Cell & Environment*, 36(3), pp. 697–705. Available at:  
524 <https://doi.org/10.1111/pce.12007>.
- 525 Monasterio, I. and Graham, R.D. (2000) 'Breeding for Trace Minerals in Wheat', *Food and  
526 Nutrition Bulletin*, 21(4), pp. 392–396. Available at:  
527 <https://doi.org/10.1177/156482650002100409>.
- 528 Myers, S.S., Zanutti, A., Kloog, I., Huybers, P., Leakey, A.D.B., Bloom, A.J., *et al.* (2014)  
529 'Increasing CO<sub>2</sub> threatens human nutrition', *Nature*, 510(7503), pp. 139–142. Available at:  
530 <https://doi.org/10.1038/nature13179>.
- 531 Myers, S.S. *et al.* (2017) 'Climate Change and Global Food Systems: Potential Impacts on Food  
532 Security and Undernutrition', *Annual Review of Public Health*, 38(1), pp. 259–277. Available at:  
533 <https://doi.org/10.1146/annurev-publhealth-031816-044356>.
- 534 Parvin, S. *et al.* (2019) 'Grain mineral quality of dryland legumes as affected by elevated CO<sub>2</sub>  
535 and drought: a FACE study on lentil (*Lens culinaris*) and faba bean (*Vicia faba*)', *Crop and  
536 Pasture Science*, 70(3), pp. 244–253. Available at: <https://doi.org/10.1071/CP18421>.
- 537 Poorter, H. *et al.* (1997) 'The effect of elevated CO<sub>2</sub> on the chemical composition and  
538 construction costs of leaves of 27 C<sub>3</sub> species', *Plant, Cell & Environment*, 20(4), pp. 472–482.
- 539 Poorter, H. *et al.* (2012) 'Pot size matters: a meta-analysis of the effects of rooting volume on  
540 plant growth', *Functional Plant Biology*, 39(11), p. 839. Available at:  
541 <https://doi.org/10.1071/FP12049>.

- 542 Rachmilevitch, S., Cousins, A.B. and Bloom, A.J. (2004) 'Nitrate assimilation in plant shoots  
543 depends on photorespiration', *Proceedings of the National Academy of Sciences*, 101(31), pp.  
544 11506–11510. Available at: <https://doi.org/10.1073/pnas.0404388101>.
- 545 Rogers, H.H. *et al.* (1984) 'Influence of Elevated CO<sub>2</sub> on Growth of Soybean Plants<sup>1</sup>', *Crop*  
546 *Science*, 24(2), p. cropsoci1984.0011183X002400020036x. Available at:  
547 <https://doi.org/10.2135/cropsoci1984.0011183X002400020036x>.
- 548 Rogers, H.H. *et al.* (1992) 'Response of plant roots to elevated atmospheric carbon dioxide',  
549 *Plant, Cell & Environment*, 15(6), pp. 749–752. Available at: <https://doi.org/10.1111/j.1365-3040.1992.tb01018.x>.
- 551 Rogers, H.H., Heck, W.W. and Heagle, A.S. (1983) 'A Field Technique for the Study of Plant  
552 Responses to Elevated Carbon Dioxide Concentrations', *Journal of the Air Pollution Control*  
553 *Association*, 33(1), pp. 42–44. Available at: <https://doi.org/10.1080/00022470.1983.10465546>.
- 554 Runion, G. *et al.* (2008) 'Effects of elevated atmospheric CO<sub>2</sub> on a C<sub>3</sub> and a C<sub>4</sub> invasive weed.'
- 555 Sanz-Sáez, Á. *et al.* (2017) 'Leaf and canopy scale drivers of genotypic variation in soybean  
556 response to elevated carbon dioxide concentration', *Global Change Biology*, 23(9), pp. 3908–  
557 3920. Available at: <https://doi.org/10.1111/gcb.13678>.
- 558 Schmutz, J. *et al.* (2010) 'Genome sequence of the palaeopolyploid soybean', *Nature*, 463(7278),  
559 pp. 178–183. Available at: <https://doi.org/10.1038/nature08670>.
- 560 Searles, P.S. and Bloom, A.J. (2003) 'Nitrate photo-assimilation in tomato leaves under short-  
561 term exposure to elevated carbon dioxide and low oxygen', *Plant, Cell & Environment*, 26(8),  
562 pp. 1247–1255. Available at: <https://doi.org/10.1046/j.1365-3040.2003.01047.x>.
- 563 Soares, J.C. *et al.* (2019) 'Preserving the nutritional quality of crop plants under a changing  
564 climate: importance and strategies', *Plant and Soil*, 443, pp. 1–26.
- 565 Soba, D. *et al.* (2020) 'Effects of elevated [CO<sub>2</sub>] on photosynthesis and seed yield parameters in  
566 two soybean genotypes with contrasting water use efficiency', *Environmental and Experimental*  
567 *Botany*, 178, p. 104154. Available at: <https://doi.org/10.1016/j.envexpbot.2020.104154>.
- 568 Taub, D.R., Miller, B. and Allen, H. (2008) 'Effects of elevated CO<sub>2</sub> on the protein concentration  
569 of food crops: a meta-analysis: ELEVATED CO<sub>2</sub> AND CROP PROTEIN  
570 CONCENTRATIONS', *Global Change Biology*, 14(3), pp. 565–575. Available at:  
571 <https://doi.org/10.1111/j.1365-2486.2007.01511.x>.
- 572 Taub, D.R. and Wang, X. (2008) 'Why are Nitrogen Concentrations in Plant Tissues Lower  
573 under Elevated CO<sub>2</sub>? A Critical Examination of the Hypotheses', *Journal of Integrative Plant*  
574 *Biology*, 50(11), pp. 1365–1374. Available at: <https://doi.org/10.1111/j.1744-7909.2008.00754.x>.
- 575 Tulchinsky, T.H. (2010) 'Micronutrient Deficiency Conditions: Global Health Issues', *Public*  
576 *Health Reviews*, 32(1), pp. 243–255. Available at: <https://doi.org/10.1007/BF03391600>.



- 577 Van Vuuren, M.M.I. *et al.* (1997) 'Effects of elevated atmospheric CO<sub>2</sub> and soil water  
578 availability on root biomass, root length, and N, P and K uptake by wheat', *New Phytologist*,  
579 135(3), pp. 455–465. Available at: <https://doi.org/10.1046/j.1469-8137.1997.00682.x>.
- 580 Wang, H., Inukai, Y. and Yamauchi, A. (2006) 'Root Development and Nutrient Uptake',  
581 *Critical Reviews in Plant Sciences*, 25(3), pp. 279–301. Available at:  
582 <https://doi.org/10.1080/07352680600709917>.
- 583 Welch, R.M. and Graham, R.D. (2005) 'Agriculture: the real nexus for enhancing bioavailable  
584 micronutrients in food crops', *Journal of Trace Elements in Medicine and Biology*, 18(4), pp.  
585 299–307. Available at: <https://doi.org/10.1016/j.jtemb.2005.03.001>.
- 586 Wickham, H. *et al.* (2016) 'Create elegant data visualisations using the grammar of graphics', *R*  
587 *package version*, 3(0).
- 588
- 589

590 **Figure Legends**

591 **Figure 1. The effect of eCO<sub>2</sub> on (A) stomatal conductance ( $g_s$ ) and (B) carbon assimilation**  
592 **(A) rate during 34 DAP and (C) stomatal conductance ( $g_s$ ) and (D) carbon assimilation rate**  
593 **(A) 91 DAP time points.** Different letters indicate significant differences across treatments.  
594 Brackets represent significance ( $p < 0.05$ ) of main effect of CO<sub>2</sub> from the two-way ANOVA and  
595 are provided for clarity. NS represents no significance. Results of main effect statistics are placed  
596 in the upper corners.

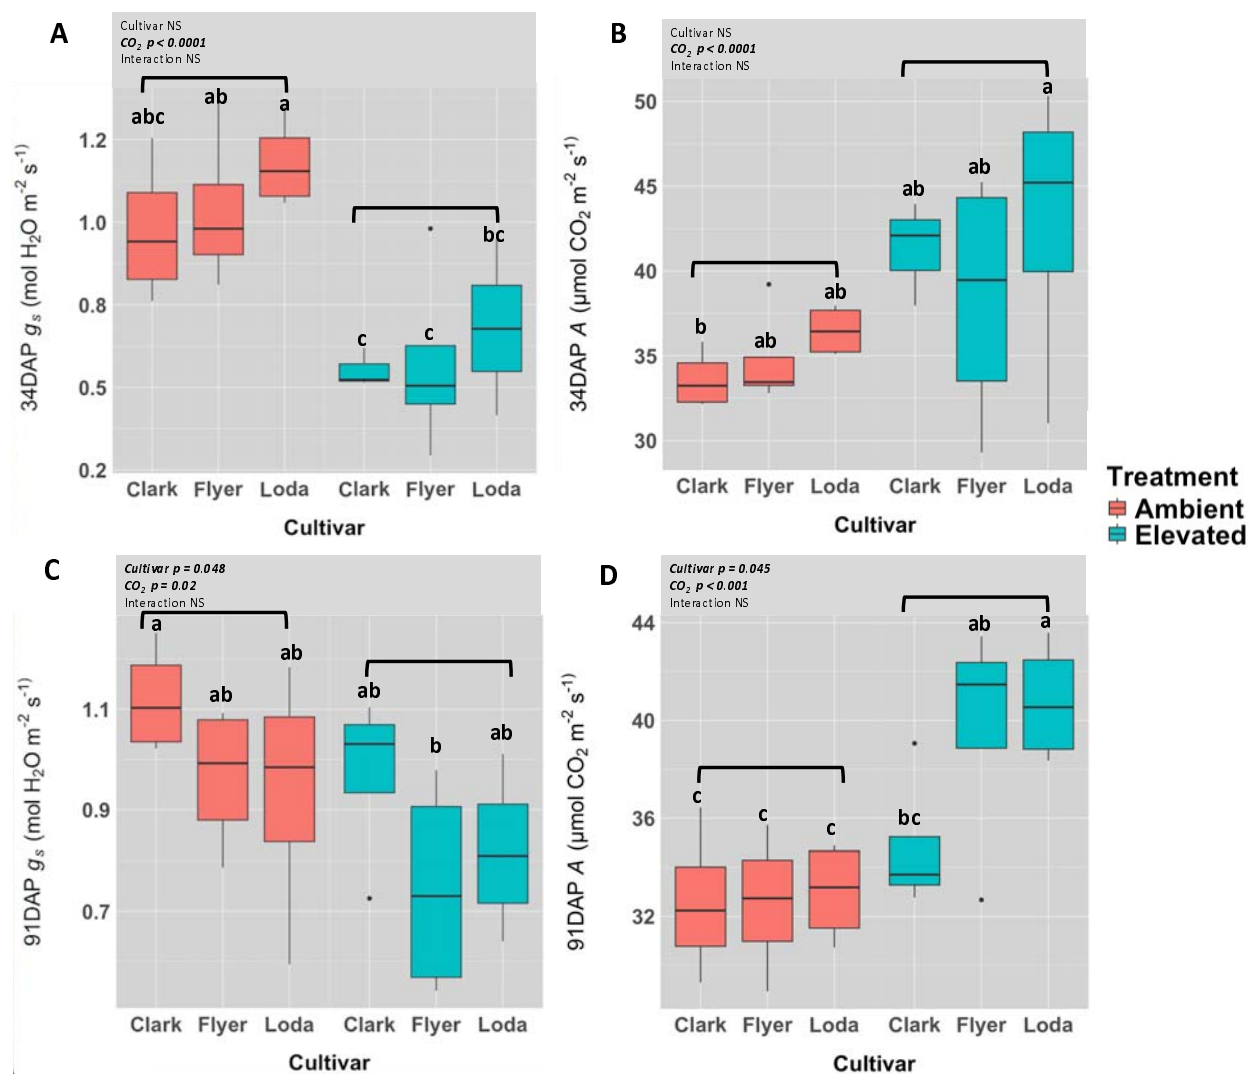

597

598 **Figure 2. The effect of eCO<sub>2</sub> on aboveground biomass and total seed yield. at (A) 70 DAP**  
599 **(B) 126 DAP and on seed yield at (C) 70 DAP and (D) 126 DAP.** Different letters indicate  
600 significant differences across treatments. Brackets represent significance ( $p < 0.05$ ) of main  
601 effect of CO<sub>2</sub> from the two-way ANOVA and are provided for clarity. Results of main effect  
602 statistics are placed in the upper corners. NS represents no significance.

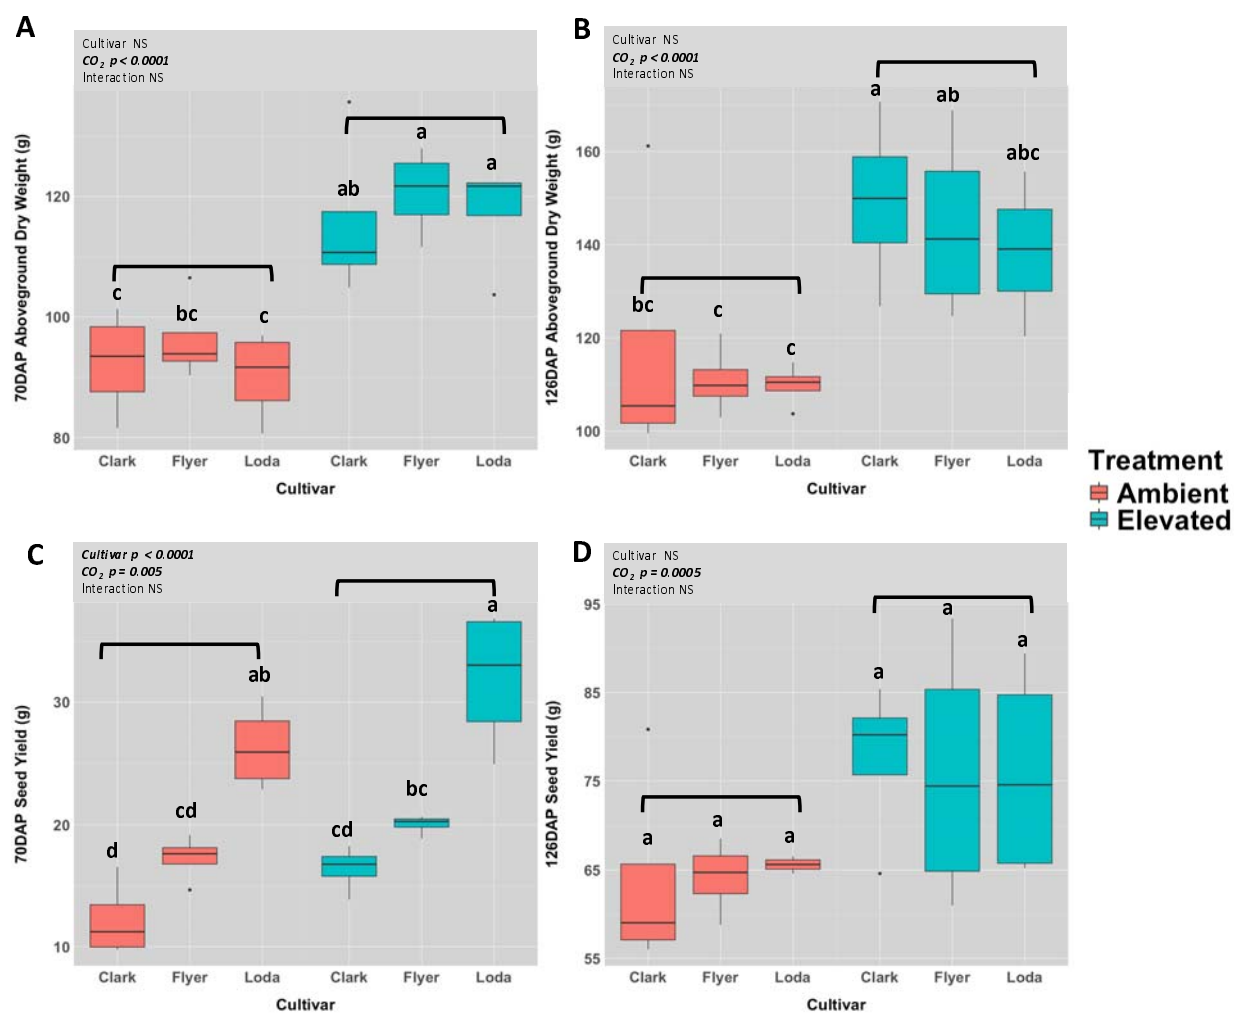

603

604

605 **Figure 3. The effect of eCO<sub>2</sub> on (A) leaf dry weight and (B) root dry weight at 70 DAP.** Leaf  
606 biomass per plant of each cultivar at 70 DAP in ambient and eCO<sub>2</sub>. Different letters indicate  
607 significant differences across treatments. Brackets represent significance ( $p < 0.05$ ) of main  
608 effect of CO<sub>2</sub> from the two-way ANOVA and are provided for clarity. Results of main effect  
609 statistics are placed in the upper corners. NS represents no significance.

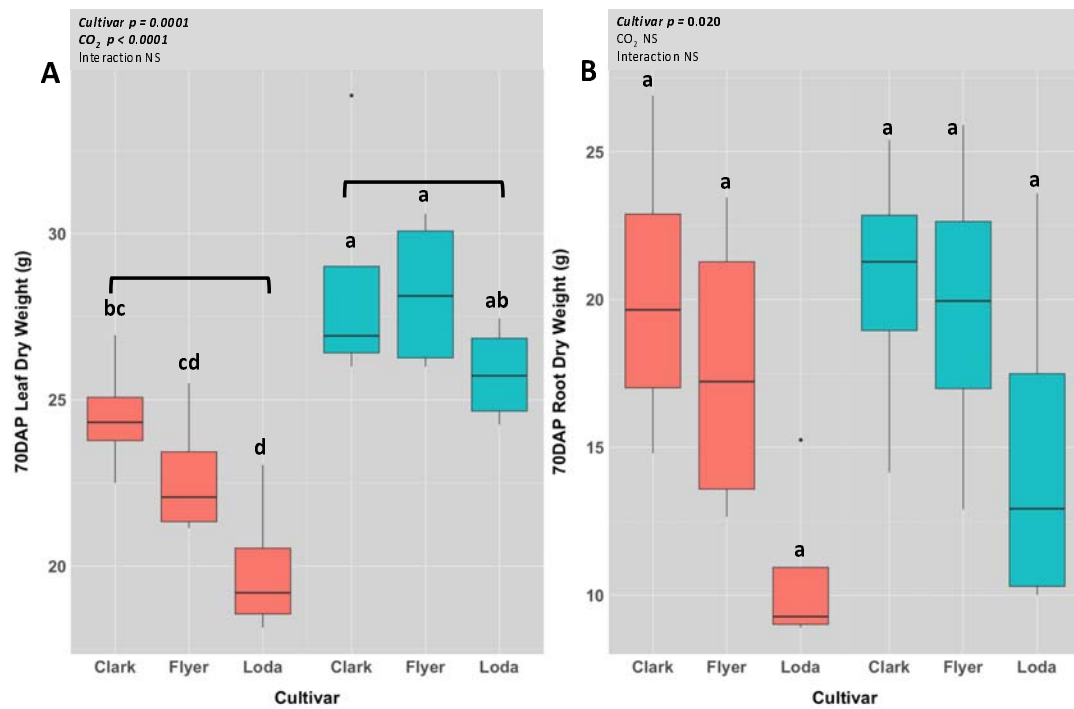

610

611

612 **Figure 4. Percent change (%) at eCO<sub>2</sub> versus ambient CO<sub>2</sub> of seed macronutrient**  
 613 **concentration in Clark (C), Flyer (F) and Loda (L).** (A) The percent change in macronutrient  
 614 (N, P, K, Mg, Ca, and S) concentration in seed, during (A) 70 DAP and (B) 126 DAP. Percent  
 615 change was calculated as ((elevated-ambient)/elevated) \*100. Asterisks indicate significant  
 616 differences ( $p < 0.05$ ) between elevated and ambient measured/absolute values (for values see  
 617 Table S2-3). The  $p$  values are from two-way ANOVA of the absolute values. Results of main  
 618 effect statistics are placed in the table below the figure.

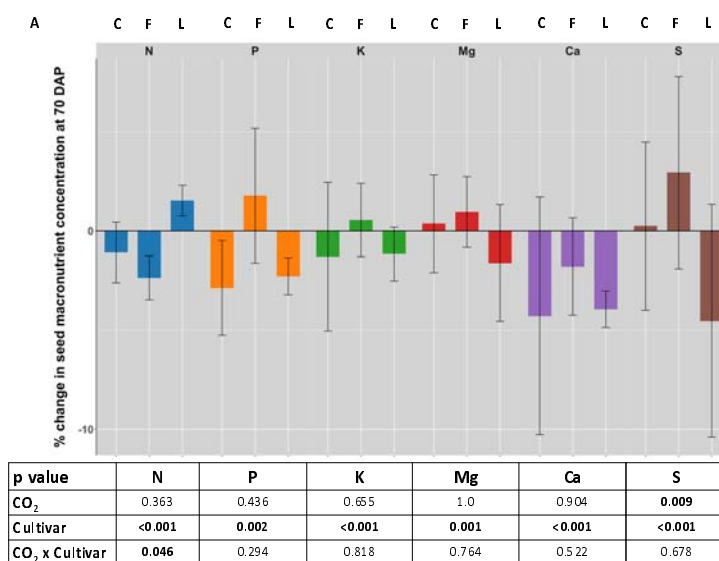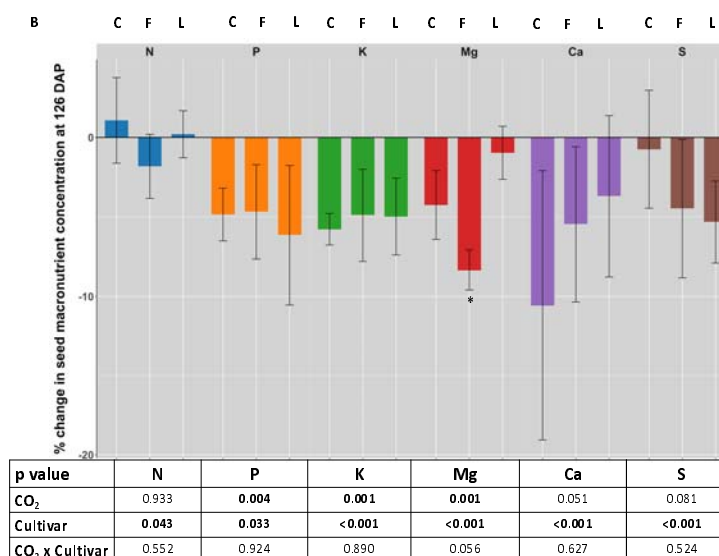

620 **Figure 5. Percent change (%) at eCO<sub>2</sub> versus ambient CO<sub>2</sub> of the seed micronutrient**  
 621 **concentration in Clark (C), Flyer (F) and Loda (L).** The percent change in micronutrient (Zn,  
 622 Fe, B, Mn, and Cu) concentration in seed at (A) 70 DAP and (B) 126 DAP. Percent change was  
 623 calculated as ((elevated-ambient)/elevated) \*100. Asterisks indicate significant differences ( $p <$   
 624 0.05) from the two-way ANOVA between elevated and ambient measured/absolute values (see  
 625 Table S2-3).

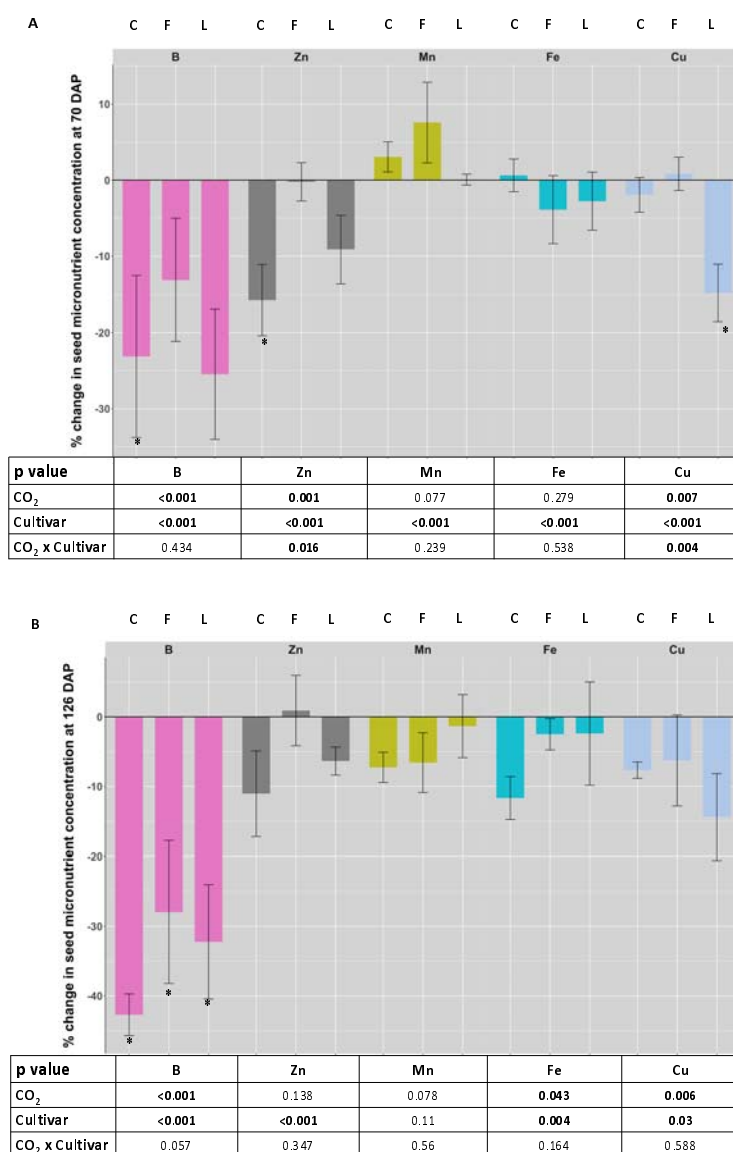

**Figure 6. Percent change (%) at eCO<sub>2</sub> versus ambient CO<sub>2</sub> of the seed nutrient uptake in Clark (C), Flyer (F) and Loda (L).** The percent change in macro (g/total biomass per tissue per plant) and micro (mg/total biomass per tissue per plant) nutrient uptake (macronutrients: N, P, K, Mg, Ca, S; micronutrients: B, Zn, Mn, Fe and Cu) in seed at 126 DAP. Percent change was calculated as ((elevated-ambient)/elevated) \*100. Asterisks indicate significant differences between elevated and ambient measured/absolute values (see Table S4). The *p* values are from two-way ANOVA of the absolute values.

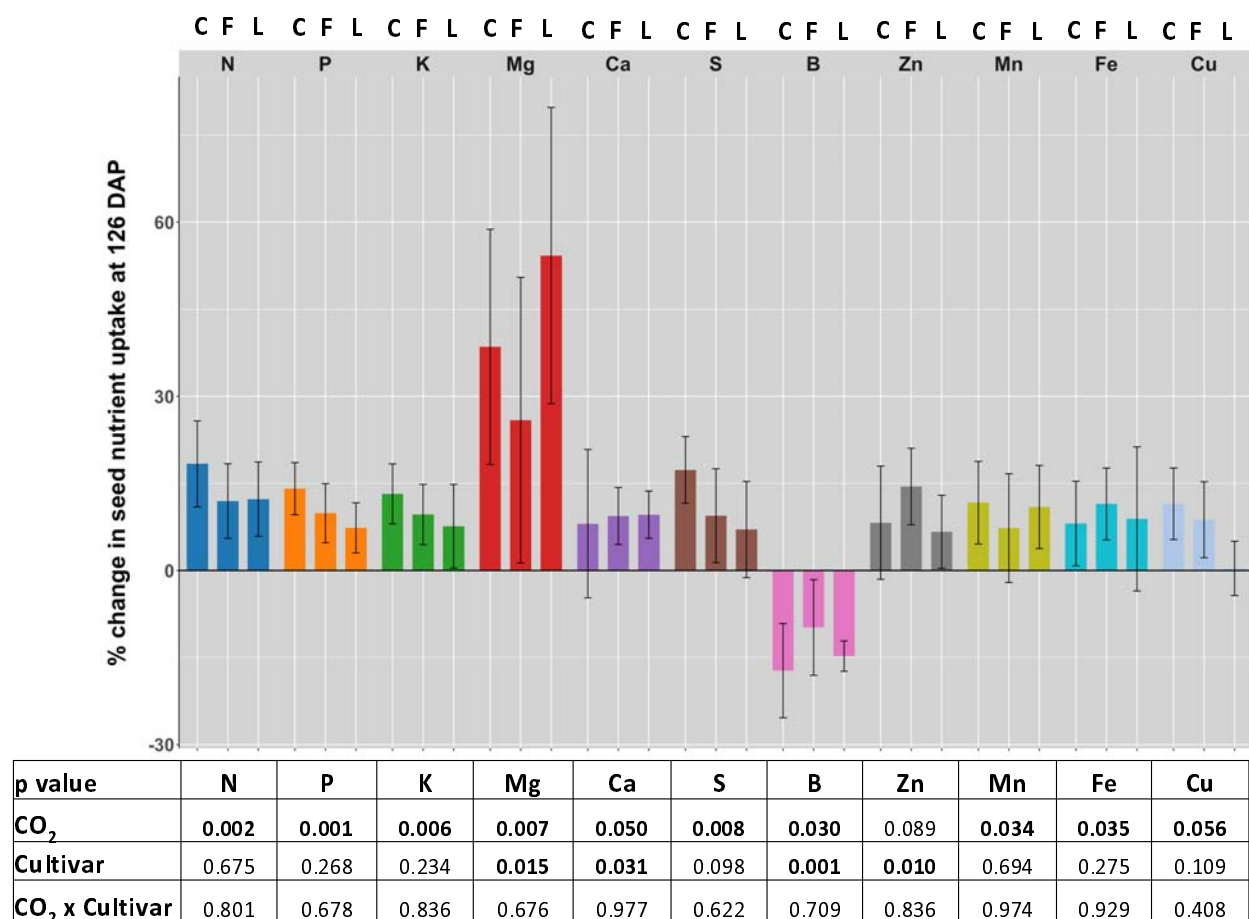

## Supplemental Figures

**Figure S1. The effect of eCO<sub>2</sub> on per seed dry weight (A) 70 DAP (B) 126 DAP.** Per seed dry weight of each cultivar at 70 DAP in ambient and eCO<sub>2</sub>. Different letters indicate significant differences across treatments. Brackets represent significance ( $p < 0.05$ ) of main effect of CO<sub>2</sub> from the two-way ANOVA and are provided for clarity. Results of main effect statistics are placed in the upper corners. NS represents no significance.

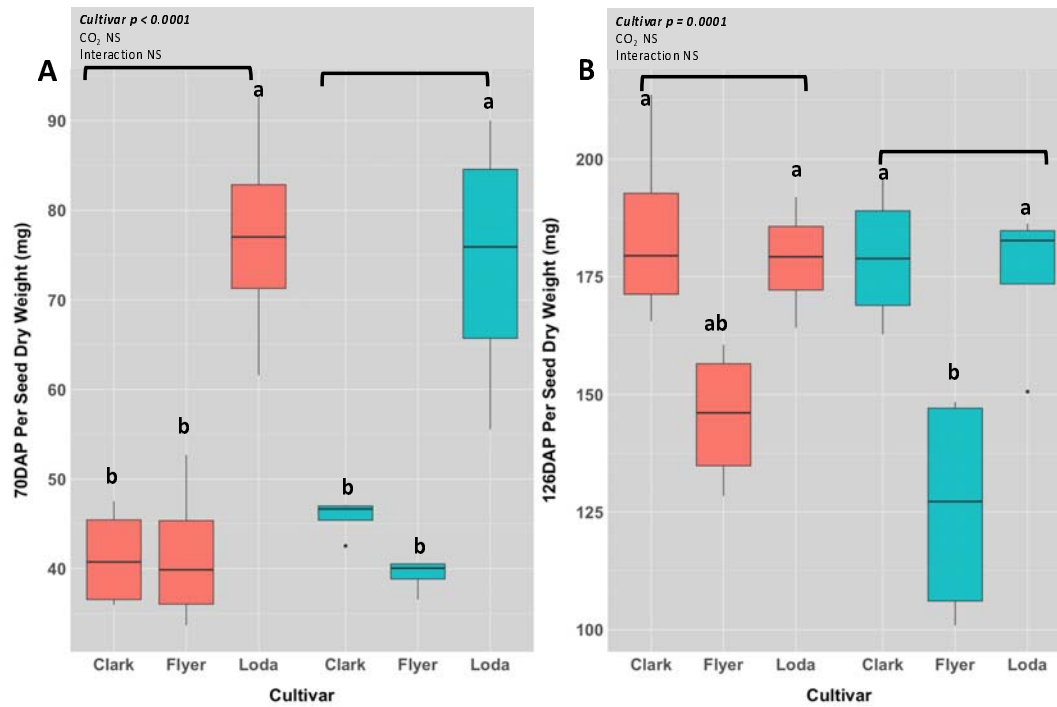



**Figure S2. The effect of eCO<sub>2</sub> on seed number at (A) 70 DAP and (B) 126 DAP.** Seed number per plant of each cultivar at 70 DAP in ambient and eCO<sub>2</sub>. Different letters indicate significant differences across treatments. Brackets represent significance ( $p < 0.05$ ) of main effect of CO<sub>2</sub> from the two-way ANOVA and are provided for clarity. Results of main effect statistics are placed in the upper corners. NS represents no significance.

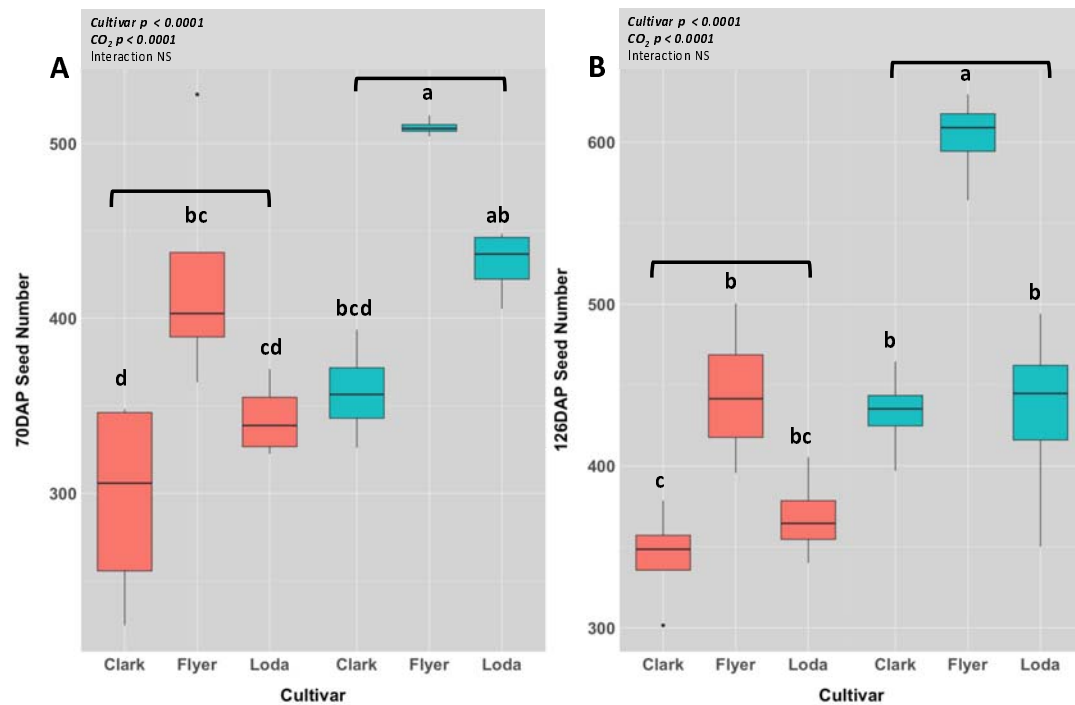

**Figure S3. The effect of eCO<sub>2</sub> on harvest index at (A) 70 DAP and (B) 126 DAP.** Harvest index per plant of each cultivar at 70 DAP in ambient and eCO<sub>2</sub>. Different letters indicate significant differences across treatments. Brackets represent significance ( $p < 0.05$ ) of main effect of CO<sub>2</sub> from the two-way ANOVA and are provided for clarity. Results of main effect statistics are placed in the upper corners. NS represents no significance.

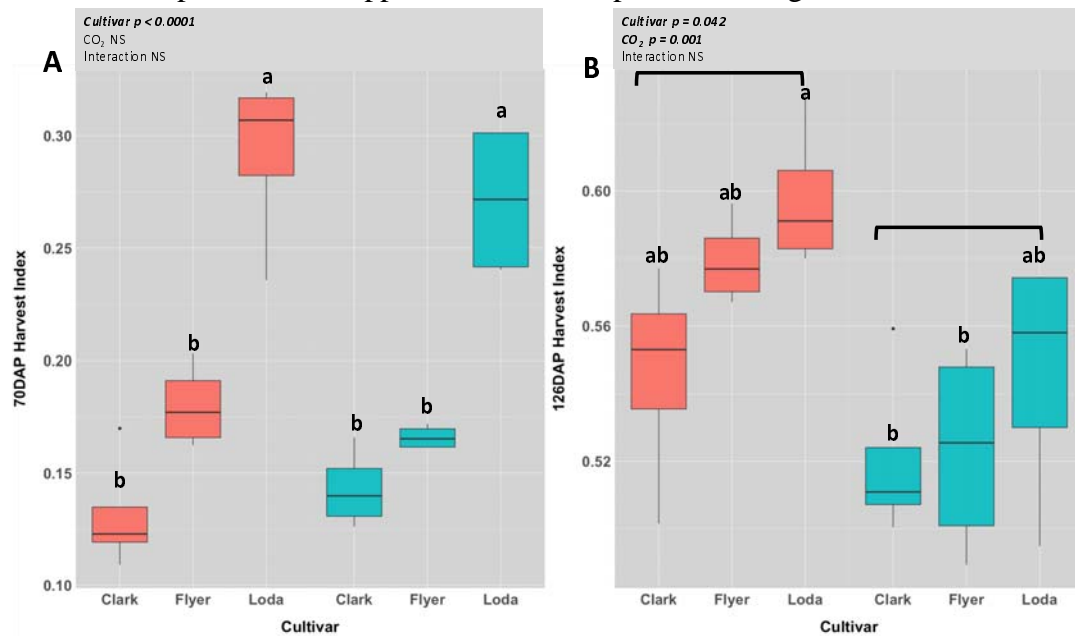

**Figure S4. Percent change (%) at eCO<sub>2</sub> versus ambient CO<sub>2</sub> of the root and leaf nutrient uptake in Clark (C), Flyer (F) and Loda (L).** The percent change in macro- (g/total biomass per tissue per plant) and micronutrient (mg/total biomass per tissue per plant) uptake (macronutrients: N, P, K, Mg, Ca, S; micronutrients: B, Zn, Mn, Fe and Cu) in (A) leaf and (B) root tissue at 70 DAP. Percent change was calculated as ((elevated-ambient)/elevated) \*100. Asterisks indicate significant differences between elevated and ambient measured/absolute values (see Table S4). The *p* values are from two-way ANOVA of the absolute values.

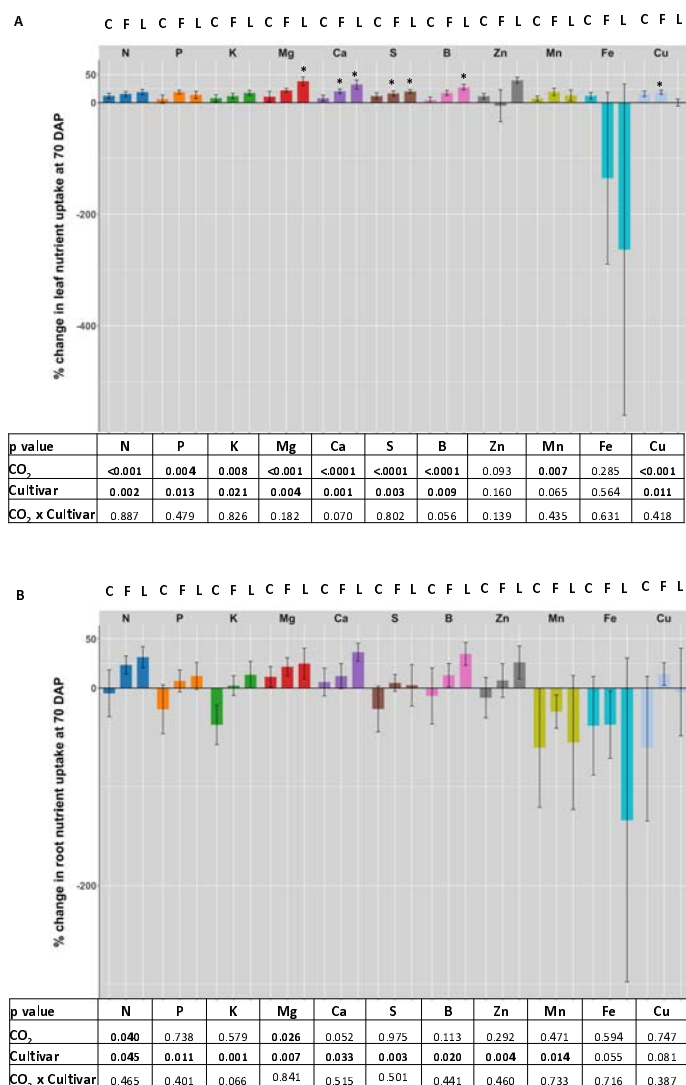

Source: https://www.biorxiv.org/content/10.1101/2024.08.02.606357v1.full.pdf
